# Supplementary material for: Isothiazolinones as Novel Candidate Insecticides for the Control of Hemipteran Insects
Source: MDPI journal article supplement (doi:10.3390/antibiotics10040436), 2021-04-14
Supplement: s1 [file s1]

Article

# Isothiazolinones as Novel Candidate Insecticides for the Control of Hemipteran Insects

Wen-Ze He, Li-Long Pan, Wen-Hao Han and Xiao-Wei Wang \*

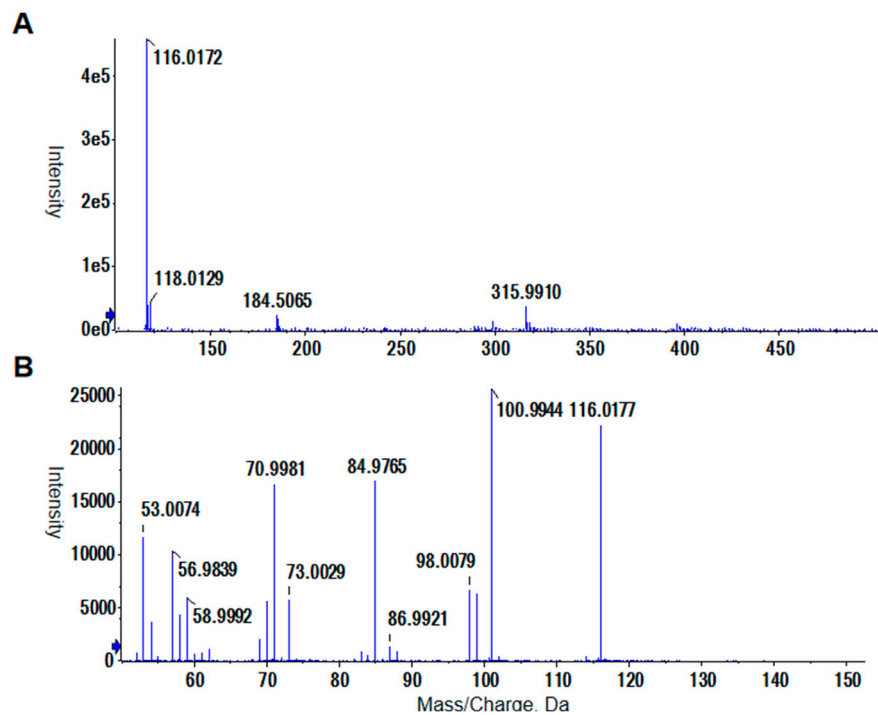

**Figure S1.** MS ion chromatograms of the substance peaked at 0.8396 min in LC analysis. Analysis of ion chromatograms revealed the chemical is 2-methyl-4-isothiazolin-3-one.

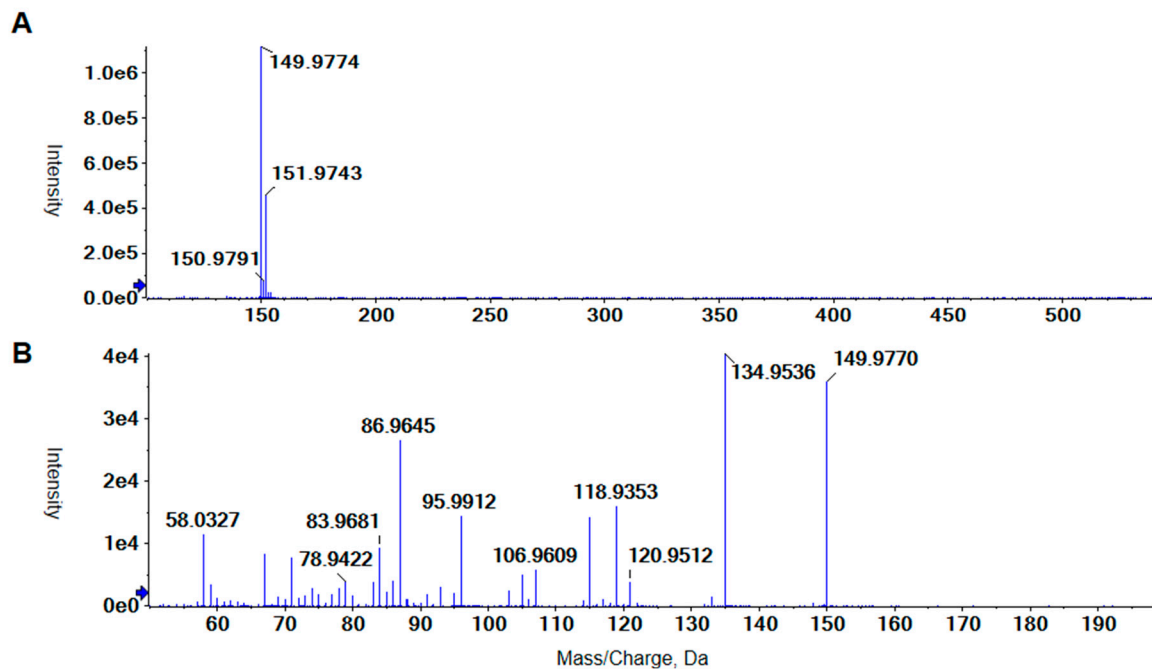

**Figure S2.** MS ion chromatograms of the substance peaked at 1.9542 min in LC analysis. Analysis of ion chromatograms revealed the chemical is 2-methyl-4-isothiazolin-3-one hydrochloride.
